# Supplementary material for: A Comparative EPR Study of Non-Substituted and Mg-Substituted Hydroxyapatite Behaviour in Model Media and during Accelerated Ageing
Source: MDPI journal article supplement (doi:10.3390/cryst12020297), 2022-02-19
Supplement: s1 [file s1]

Supplementary materials

# A comparative EPR study of non-substituted and Mg-substituted hydroxyapatite behaviour in model media and during accelerated ageing

Monica Vidotto<sup>1</sup>, Timor Grego<sup>2,3&</sup>, Božana Petrović<sup>4</sup>, Nicolas Somers<sup>5</sup>, Tatjana Antonić Jelić<sup>6</sup>, Damir Kralj<sup>7</sup>, Nives Matijaković Mlinarić<sup>7</sup>, Anne Leriche<sup>5</sup>, Maja Dutour Sikirić<sup>8</sup>, Ina Erceg<sup>8\*</sup>, Nadica Maltar-Strmečki<sup>1\*</sup>

<sup>1</sup>Laboratory for Electron Spin Spectroscopy, Division of Physical Chemistry, Ruđer Bošković Institute, Bijenička c. 54, 10 000 Zagreb, Croatia; Monica.Vidotto@irb.hr, nstrm@irb.hr

<sup>2</sup>Department of Occupational Safety and Health, Fire and Radiation Protection Ruđer Bošković Institute, Bijenička c. 54, 10 000 Zagreb, Croatia; Timor.Gregor@irb.hr

<sup>3</sup>University Hospital Centre Zagreb, Kišpatićeva 12, Zagreb, Croatia; Timor.Gregor@irb.hr

<sup>4</sup>Laboratory for Atomic Physics, Vinča Institute of Nuclear Sciences- National Institute of the Republic of Serbia, Mike Petrovića Alasa 12-14, 11351 Vinča, Belgrade, Serbia; bozana@vin.bg.ac.rs

<sup>5</sup>Université Polytechnique Hauts-de-France (UPHF), FR CERAMATHS Département Matériaux et Procédés 59600 Maubeuge, France; [anne.leriche@uphf.fr](mailto:anne.leriche@uphf.fr), [nicolas.somers@uphf.fr](mailto:nicolas.somers@uphf.fr)

<sup>6</sup>Laboratory for synthesis of new materials, Division of Materials Chemistry, Ruđer Bošković Institute, Bijenička c. 54, 10 000 Zagreb, Croatia; Tatjana.Antonic.Jelic@irb.hr

<sup>7</sup>Laboratory for Precipitation Processes, Division of Materials Chemistry, Ruđer Bošković Institute, Bijenička c. 54, 10 000 Zagreb, Croatia; Damir.Kralj@irb.hr, Nives.Matijakovic.Mlinaric@irb.hr

<sup>8</sup>Laboratory for Biocolloids and Surface Chemistry, Division of Physical Chemistry, Ruđer Bošković Institute, Bijenička c. 54, 10 000 Zagreb, Croatia; [ierceg@irb.hr](mailto:ierceg@irb.hr), [sikiric@irb.hr](mailto:sikiric@irb.hr)

**Citation:** Vidotto, M.; Grego, T.; Petrović, B.; Somers, N.; Antonić Jelić, T.; Kralj, D.; Matijaković Mlinarić, N.; Leriche, A.; Dutour Sikirić, M.; Erceg, I.; et al. A Comparative EPR Study of Non-Substituted and Mg-Substituted Hydroxyapatite Behaviour in Model Media and during Accelerated Ageing. *Crystals* **2022**, *12*, 297. <https://doi.org/10.3390/cryst12020297>

\* Correspondence: [ierceg@irb.hr](mailto:ierceg@irb.hr), I.E.; [nstrm@irb.hr](mailto:nstrm@irb.hr), N.M.S.

& Monica Vidotto and Timor Grego contributed equally to this work and share co-first authorship

Academic Editor: Jaime Gómez Morales

Received: 3 February 2022

Accepted: 18 February 2022

Published: 19 February 2022

**Publisher's Note:** MDPI stays neutral with regard to jurisdictional claims in published maps and institutional affiliations.

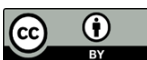

**Copyright:** © 2022 by the authors. Submitted for possible open access publication under the terms and conditions of the Creative Commons Attribution (CC BY) license (<https://creativecommons.org/licenses/by/4.0/>).

## Content of listed material:

**Figure S1.** EDS images of a) hydroxyapatite (HAP) and b) Mg-substituted.

**Figure S2.** TGA curves of non-substituted hydroxyapatite (HAP) and Mg-substituted HAP (Mg HAP).

**Figure S3.** a) EPR spectra of irradiated Mg-substituted hydroxyapatite heated at 373 K at different times and b) peak-peak linewidth of  $\text{CO}_2^-$  radical.

**Table S1.** Assignment of peaks in PXRD patterns of hydroxyapatite.

**Table S2.** Assignment of IR bands in FTIR spectra of hydroxyapatite.

**Table S3.** Assignment of peaks in PXRD patterns of Mg-substituted hydroxyapatite.

**Table S4.** Assignment of IR bands in FTIR spectra of Mg-substituted hydroxyapatite.

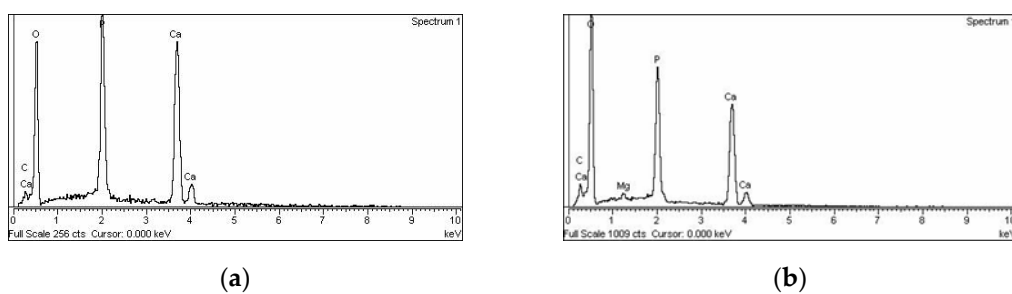

**Figure S1.** EDS images of a) hydroxyapatite (HAP) and b) Mg-substituted.

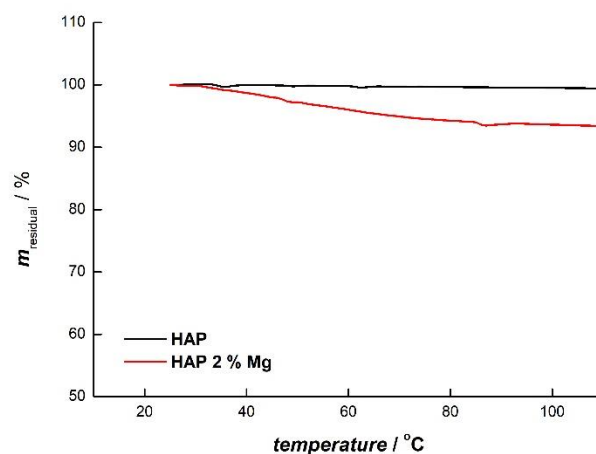

**Figure S2.** TGA curves of non-substituted hydroxyapatite (HAP) and Mg-substituted HAP (Mg HAP).

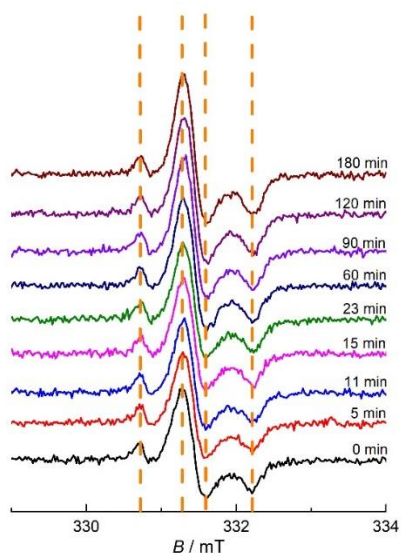

**(a)**

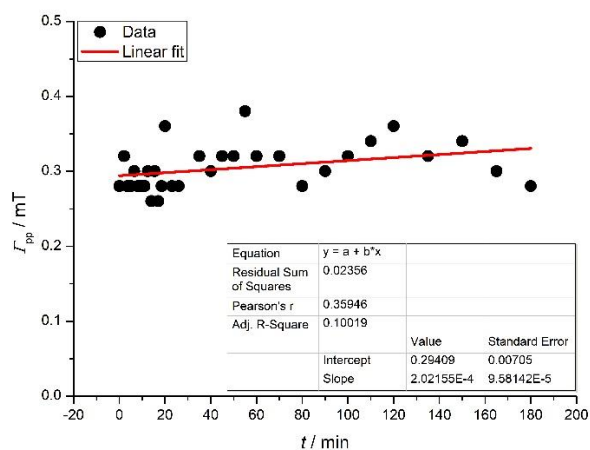

**(b)**

**Figure S3.** a) EPR spectra of irradiated hydroxyapatite substituted with 0.25% Mg heated at 373 K at different times and b) relation between the relative distance of EPR peaks and time of heating for sample Mg-HAP at 373 K.

**Table S1.** Assignment of peaks in PXRD patterns of hydroxyapatite (HAP), the initial powder, powder obtained after the irradiation, and after immersion in corrected simulated body fluid (c-SBF) and saline solution (SS) for 1 - 28 days at 37 °C.

| Assignment | HAP       |            | c-SBF |       |       | SS    |       |       |
|------------|-----------|------------|-------|-------|-------|-------|-------|-------|
|            | untreated | irradiated | 1d    | 14d   | 28d   | 1d    | 14d   | 28d   |
| 100        | 10.86     | 10.76      | 10.86 | 10.86 | 10.81 | 10.80 | 10.89 | 10.90 |
|            |           |            |       | 13.67 | 13.47 |       | 13.72 | 13.67 |
| 101        | 16.9      | 16.76      | 16.87 | 16.89 | 16.8  | 16.83 | 16.91 | 16.86 |
| 110        | 18.86     | 18.82      | 18.86 | 19.32 | 18.79 | 18.74 |       |       |
| 200        | 21.83     | 21.71      | 21.82 | 21.87 | 21.74 | 21.73 | 21.81 | 21.78 |
| 111        | 22.9      | 22.77      | 22.88 | 22.95 | 22.82 | 22.83 | 22.94 | 22.85 |
| 002        | 25.91     | 25.79      | 25.90 | 25.97 | 25.85 | 25.85 | 25.95 | 25.91 |
| 102        | 28.18     | 28.05      | 28.12 | 28.19 | 28.11 | 28.10 | 28.20 | 28.13 |
| 210        | 28.97     | 28.84      | 28.93 | 29.02 | 28.91 | 28.89 | 28.98 | 28.97 |
|            | 31.17     | 31.02      | 31.14 | 31.19 |       | 31.20 |       |       |
| 211        | 31.81     | 31.69      | 31.78 | 31.85 | 31.75 | 31.74 | 31.82 | 31.80 |
| 112        | 32.25     | 32.11      | 32.2  | 32.27 | 32.17 | 32.16 | 32.25 | 32.21 |
| 300        | 32.95     | 32.83      | 32.96 | 23.99 | 32.89 | 32.88 | 32.97 | 32.94 |
| 202        | 34.11     | 33.99      | 34.07 | 34.13 | 34.05 | 34.03 | 34.12 | 34.08 |
| 311        | 35.51     | 35.86      | 35.49 | 35.52 | 35.42 | 35.45 | 35.51 | 35.46 |
| 212        | 39.24     | 39.11      | 39.22 | 39.25 | 39.2  | 39.20 | 39.20 | 39.24 |
| 310        | 39.85     | 39.72      | 39.82 | 39.89 | 39.78 | 39.77 | 39.86 | 39.84 |
| 311        | 42.07     | 41.93      | 42.01 | 42.08 | 41.95 | 41.95 | 42.05 | 42.00 |
| 113        | 43.95     | 43.79      | 43.90 | 43.87 | 43.83 | 43.82 | 43.92 | 43.92 |
| 203        | 45.34     | 45.23      | 45.43 | 45.46 | 45.43 | 45.35 | 45.49 | 45.46 |
| 222        | 46.75     | 46.61      | 46.70 | 46.78 | 46.68 | 46.66 | 46.76 | 46.71 |
| 312        | 48.12     | 48.00      | 48.09 | 48.16 | 48.07 | 48.06 | 48.14 | 48.11 |
| 320        | 48.63     | 48.52      | 48.58 | 48.60 | 48.58 | 48.57 | 48.63 | 48.67 |
| 213        | 49.53     | 49.40      | 49.51 | 49.56 | 49.45 | 49.44 | 49.54 | 49.51 |
| 321        | 50.54     | 50.42      | 50.50 | 50.58 | 50.46 | 50.45 | 50.53 | 50.51 |
| 410        | 51.31     | 51.19      | 51.31 | 51.35 | 51.25 | 51.25 | 51.31 | 51.28 |
| 402, 303   | 52.13     | 52.01      | 52.11 | 52.15 | 52.07 | 52.06 | 52.16 | 52.09 |
| 004, 411   | 53.24     | 53.11      | 53.21 | 53.26 | 53.17 | 53.16 | 53.25 | 53.23 |
| 322, 223   | 55.93     | 55.79      | 55.90 | 55.98 | 55.84 | 55.82 | 55.92 | 55.99 |
| 313        | 57.13     | 57.05      | 57.16 | 57.14 | 57.09 | 57.07 | 56.53 | 57.14 |
| 420        | 59.98     | 59.98      | 59.96 | 59.99 | 59.89 | 59.92 | 60.01 | 59.99 |
| 214, 421   | 61.61     | 61.62      | 61.77 | 61.69 | 61.62 | 61.37 | 64.74 | 61.68 |
| 405        | 63.02     | 62.92      | 62.98 | 63.09 | 62.97 | 62.94 | 63.04 | 63.03 |
| 304, 323   | 64.15     | 64.09      | 64.03 | 64.09 | 64.12 | 64.12 | 64.20 | 64.18 |
| 511        | 65.05     | 64.94      | 65.02 | 65.1  | 65.01 | 64.99 | 65.03 | 65.05 |
| 422        | 66.45     | 66.26      | 66.36 | 66.39 | 66.39 | 66.39 | 66.41 | 66.39 |

**Table S2.** Assignment of IR bands in FTIR spectra of hydroxyapatite (HAP), the initial powder, powder obtained after the irradiation, and after immersion corrected simulated body fluid (c-SBF) and saline solution (SS) for 1 - 28 days at 37 °C.

| Assignment                                    | HAP       |            | c-SBF |      |      | SS   |      |      |
|-----------------------------------------------|-----------|------------|-------|------|------|------|------|------|
|                                               | untreated | irradiated | 1d    | 14d  | 28d  | 1d   | 14d  | 28d  |
| OH <sup>-</sup>                               | 3573      | 3573       | 3573  | 3573 | 3573 | 3573 | 3573 | 3573 |
| PO <sub>4</sub> <sup>3-</sup> v <sub>3a</sub> | 1087      | 1087       | 1087  | 1087 | 1087 | 1087 | 1087 | 1087 |
| PO <sub>4</sub> <sup>3-</sup> v <sub>3c</sub> | 1024      | 1026       | 1028  | 1024 | 1027 | 1024 | 1024 | 1024 |
| PO <sub>4</sub> <sup>3-</sup> v <sub>1</sub>  | 963       | 963        | 963   | 963  | 963  | 963  | 963  | 963  |
| OH <sup>-</sup>                               | 629       | 630        | 630   | 629  | 630  | 630  | 629  | 630  |
| PO <sub>4</sub> <sup>3-</sup> v <sub>4a</sub> | 599       | 599        | 599   | 599  | 599  | 599  | 599  | 599  |
| PO <sub>4</sub> <sup>3-</sup> v <sub>4c</sub> | 564       | 565        | 566   | 562  | 565  | 564  | 564  | 562  |
| PO <sub>4</sub> <sup>3-</sup> v <sub>2b</sub> | 474       | 474        | 473   | 473  | 473  | 474  | 474  | 474  |

**Table S3.** Assignment of peaks in PXRD patterns of Mg-substituted hydroxyapatite (Mg-HAP), the initial powder, powder obtained after the irradiation, and after immersion in corrected simulated body fluid (c-SBF) and saline solution (SS) for 1 - 28 days at 37 °C.

| Assignment        | Mg - HAP  |            | c-SBF |                 |       | SS    |                 |                 |
|-------------------|-----------|------------|-------|-----------------|-------|-------|-----------------|-----------------|
|                   | untreated | irradiated | 1d    | 14d             | 28d   | 1d    | 14d             | 28d             |
|                   |           |            |       | 12.14-<br>15.18 |       |       | 12.06-<br>14.49 | 12.47-<br>15.18 |
| HAP (110)         | 18.1      | 18.04      |       |                 |       |       |                 |                 |
| HAP (111)         | 22.54     | 22.49      |       |                 |       |       |                 |                 |
| HAP (002)         | 25.90     | 25.94      | 25.90 | 25.86<br>27.34  | 25.87 | 25.83 | 25.86<br>27.43  | 25.97<br>27.41  |
| HAP (210)         | 29.01     | 28.91      | 28.32 |                 |       |       |                 |                 |
| HAP (211)         | 31.19     | 31.84      | 31.77 | 31.70           | 31.63 | 31.71 | 31.74           | 31.75           |
| HAP (112)         | 32.17     | 32.89      |       |                 |       |       |                 |                 |
| MgOH <sub>2</sub> | 37.71     | 37.74      |       |                 |       |       |                 |                 |
| HAP (310)         | 39.96     | 39.85      |       |                 |       |       |                 |                 |
| HAP (203)         |           |            |       | 45.42           | 45.39 | 45.44 | 45.46           | 45.45           |
| HAP (222)         | 46.73     | 46.6       | 46.71 | 46.70           | 46.66 | 46.58 | 46.67           | 46.62           |
| HAP (213)         | 49.34     | 49.43      | 49.4  | 49.56           | 49.79 | 49.52 | 49.47           | 49.46           |
| HAP (004)         | 53.17     | 53.17      | 53.07 | 53.17           | 53.14 | 53.07 | 53.19           | 53.31           |
| HAP               |           |            |       | 56.48           |       |       | 56.5            | 56.48           |

**Table S4.** Assignment of IR bands in FTIR spectra of Mg-substituted hydroxyapatite (Mg-HAP), the initial powder, powder obtained after the irradiation, and after immersion in corrected simulated body fluid (c-SBF) and saline solution (SS) for 1 - 28 days at 37 °C.

| Assignment                                    | Mg-HAP         |             | SBF  |      |      | Physiological |      |      |
|-----------------------------------------------|----------------|-------------|------|------|------|---------------|------|------|
|                                               | untreated      | irradiated  | 1d   | 14d  | 28d  | 1d            | 14d  | 28d  |
| H <sub>2</sub> O                              | 3564 -<br>3000 | 3560 - 2812 |      |      |      |               |      |      |
| H <sub>2</sub> O                              | 1633           | 1633        |      |      |      |               |      |      |
| CO <sub>3</sub> <sup>2-</sup>                 | 1417           | 1416        | 1448 | 1451 | 1450 | 1447          | 1448 | 1449 |
| CO <sub>3</sub> <sup>2-</sup>                 | 1329           | 1326        | 1418 | 1417 | 1417 | 1418          | 1417 | 1417 |
| PO <sub>4</sub> <sup>3-</sup> v <sub>3a</sub> | 1092           | 1086        | 1107 | 1098 | 1104 | 1100          | 1090 | 1104 |
| PO <sub>4</sub> <sup>3-</sup> v <sub>3c</sub> | 1022           | 1021        | 1022 | 1020 | 1020 | 1022          | 1020 | 1022 |
| PO <sub>4</sub> <sup>3-</sup> v <sub>1</sub>  | 961            | 961         | 961  | 961  | 961  | 961           | 961  | 961  |
| CO <sub>3</sub> <sup>2-</sup>                 | 873            | 873         | 873  | 873  | 873  | 874           | 873  | 873  |
|                                               | 828            | 828         |      |      |      |               |      |      |
| P <sub>2</sub> O <sub>7</sub> <sup>4-</sup>   | 715            | 715         |      |      |      |               |      |      |
| PO <sub>4</sub> <sup>3-</sup> v <sub>4a</sub> | 601            | 600         | 601  | 600  | 601  | 601           | 600  | 601  |
| PO <sub>4</sub> <sup>3-</sup> v <sub>4c</sub> | 561            | 561         | 561  | 560  | 560  | 561           | 560  | 561  |
| PO <sub>4</sub> <sup>3-</sup> v <sub>2b</sub> | 472            | 473         | 470  | 471  | 471  | 465           | 471  | 471  |
